# Supplementary material
Source: publisher figshare collection journal article supplement (https://frontiersin.figshare.com/ndownloader/files/24438473)
Supplement: Supplementary file [file 24438473]

## **Supplementary Data for:**

### **Characterization and *in vitro* analysis of probiotic-derived peptides against drug resistance bacterial infections**

Aninda Mazumdar<sup>1,2\*</sup>, Yazan Haddad<sup>1,2</sup>, Vishma Pratap Sur<sup>1,2</sup>, Vedran Milosavljevic<sup>1,2</sup>, Sukanya Bhowmick<sup>1,2</sup>, Hana Michalkova<sup>1</sup>, Roman Guran<sup>1,2</sup>, Radek Vesely<sup>3</sup>, Amitava Moulick<sup>1,2\*</sup>

<sup>1</sup>*Department of Chemistry and Biochemistry, Mendel University in Brno, Zemedelska 1, CZ-613 00 Brno, Czech Republic*

<sup>2</sup>*Central European Institute of Technology, Brno University of Technology, Purkynova 123, CZ-612 00 Brno, Czech Republic*

<sup>3</sup>*Department of Traumatology at the Medical Faculty, Masaryk University and Trauma Hospital of Brno, Ponavka, Czech Republic*

#### **\*Corresponding author**

Aninda Mazumdar, Department of Chemistry and Biochemistry, Mendel University in Brno, Zemedelska 1, CZ-613 00 Brno, Czech Republic; E-mail: anindamazumdar@gmail.com, xmazumda@mendelu.cz; phone: +420545133350

Amitava Moulick, Department of Chemistry and Biochemistry, Mendel University in Brno, Zemedelska 1, CZ-613 00 Brno, Czech Republic; E-mail: amitavamoulick@gmail.com; phone: +420545133350

1. Peptide designing

|       |                           |    |
|-------|---------------------------|----|
| m2386 | DSIRDVSPTFNKIRRWFDGLFK--- | 22 |
| m2163 | KRKCPKTPFDNTPGAWFAHLILGC- | 24 |
| PBDM1 | -----YKWFAHLIKGLC         | 12 |
| PBDM2 | -----YKWFRHLIKKLC         | 12 |
|       | **      * :               |    |

Figure S1: Multiple Sequence alignment of the four peptides.

2. Growth curve and viability percentage of the hospital samples

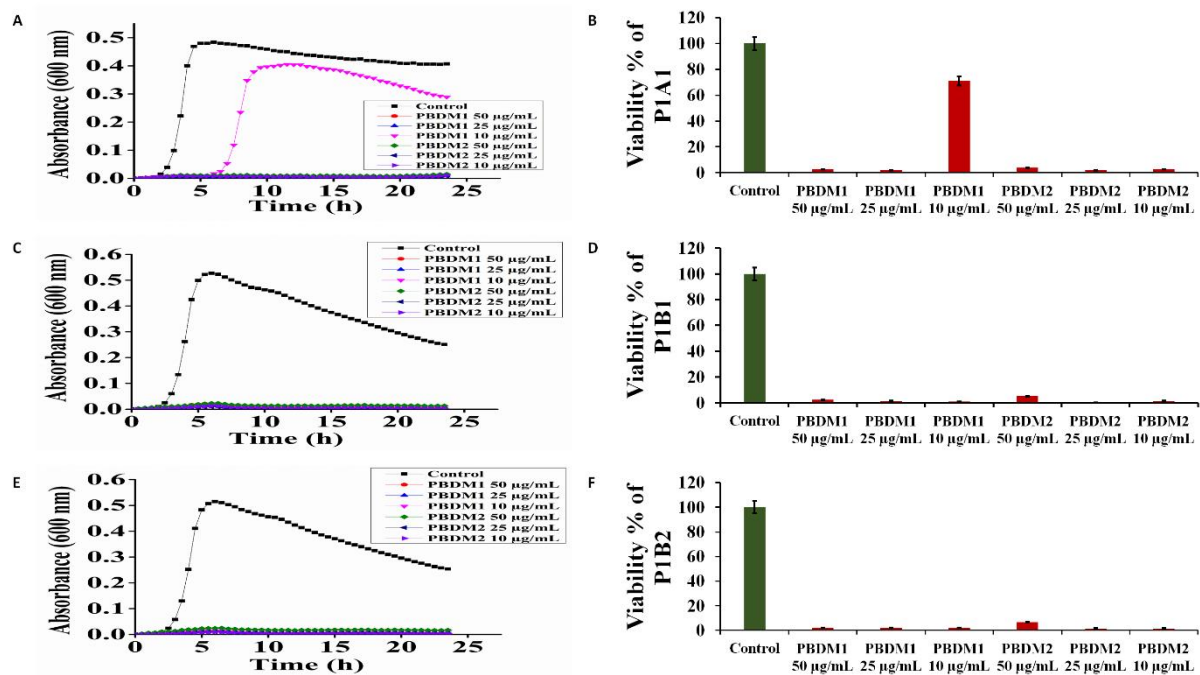

Figure S2: Growth curve and viability percentage of the bacterial samples obtained from patient P1 after treatment with PBDM peptides. Data represent the mean  $\pm$ SD, n=3.

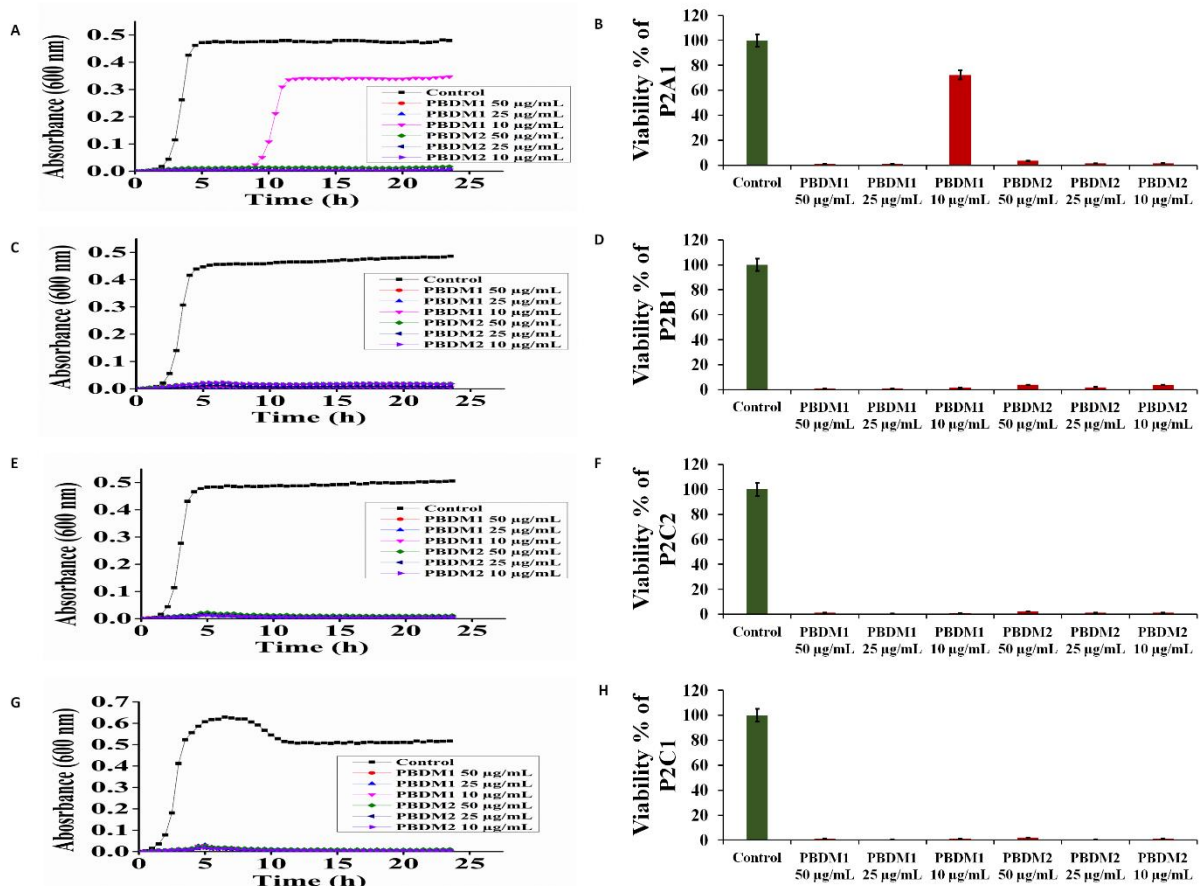

Figure S3: Growth curve and viability percentage of the bacterial samples obtained from patient P2 after treatment with PBDM peptides. Data represent the mean  $\pm$ SD, n=3.

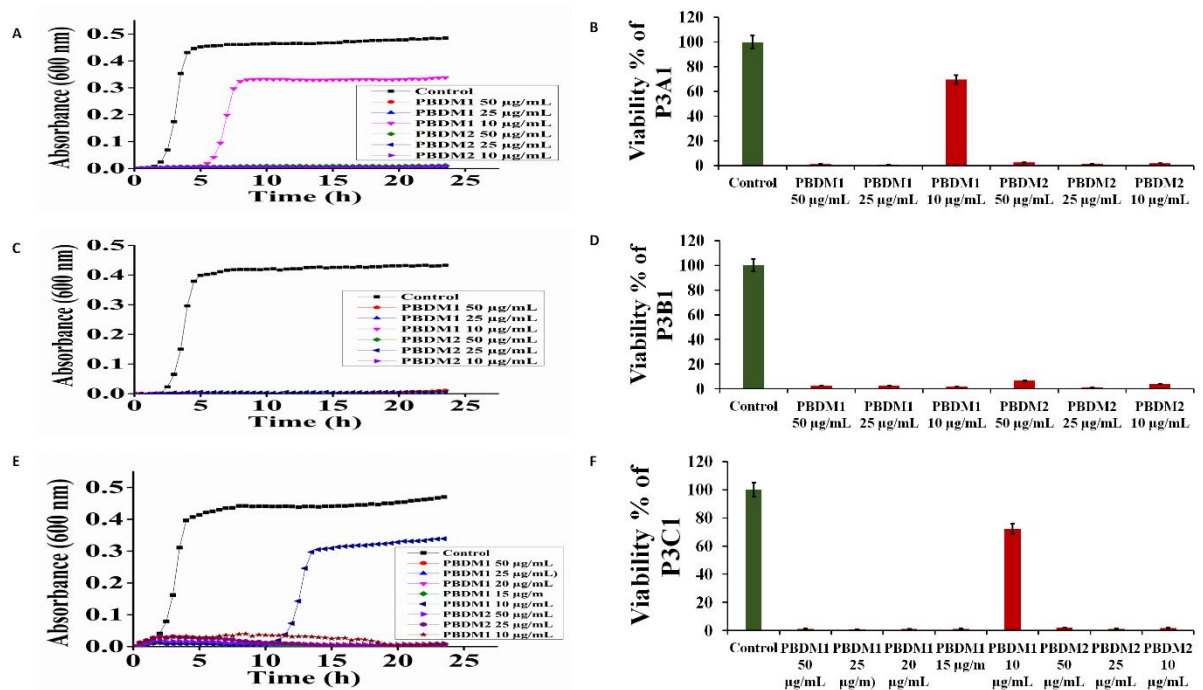

Figure S4: Growth curve and viability percentage of the bacterial samples obtained from patient P3 after treatment with PBDM peptides. Data represent the mean  $\pm$ SD, n=3.

Table S1: Overview of the antibacterial activity of PBDM peptide against Hospital samples from P1, P2 and P3.

| Sample names | Samples obtained<br>and specific name | Sample identified                 | PBDM1 MIC<br>concentration<br>( $\mu$ g/mL) | PBDM2 MIC<br>concentration<br>( $\mu$ g/mL) |
|--------------|---------------------------------------|-----------------------------------|---------------------------------------------|---------------------------------------------|
| P1           | P1A1                                  | <i>Staphylococcus aureus</i>      | 25                                          | 10                                          |
|              | P1B1                                  | <i>Staphylococcus aureus</i>      | 10                                          | 10                                          |
|              | P1B2                                  | <i>Staphylococcus aureus</i>      | 10                                          | 10                                          |
| P2           | P2A1                                  | <i>Staphylococcus epidermidis</i> | 25                                          | 10                                          |
|              | P2B1                                  | <i>Klebsiella pneumoniae</i>      | 10                                          | 10                                          |
|              | P2C1                                  | <i>Klebsiella pneumoniae</i>      | 10                                          | 10                                          |
|              | P2C2                                  | <i>Klebsiella pneumoniae</i>      | 10                                          | 10                                          |
| P3           | P3A1                                  | <i>Staphylococcus epidermidis</i> | 25                                          | 10                                          |
|              | P3B1                                  | <i>Enterobacter cloacae</i>       | 10                                          | 10                                          |
|              | P3C1                                  | <i>Enterobacter cloacae</i>       | 15                                          | 10                                          |

### 3. Multiple sequence alignment by clustal omega

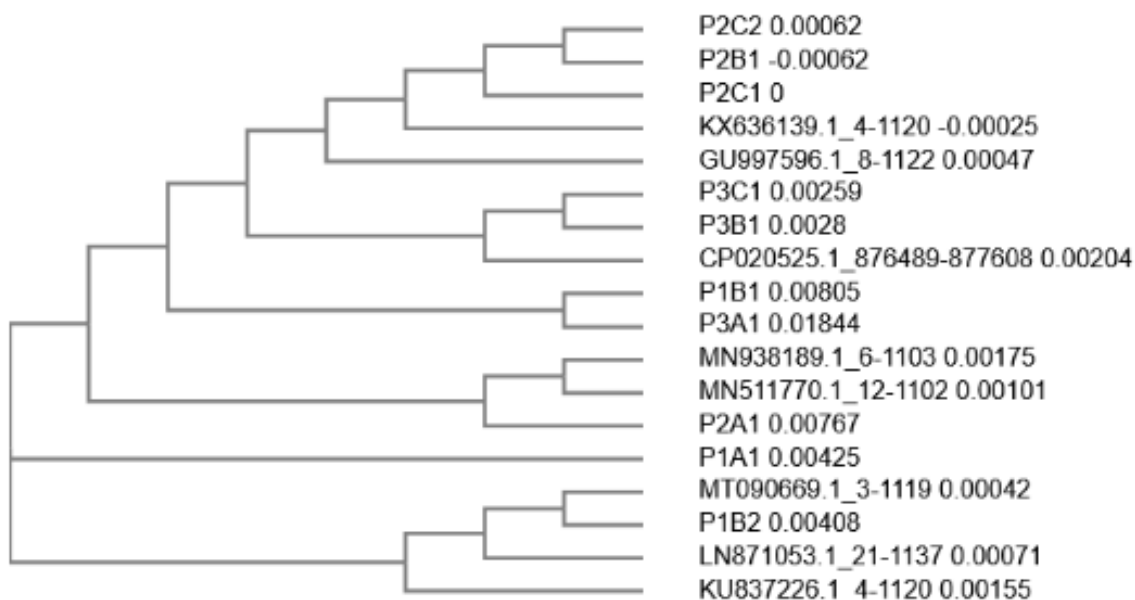

Figure S5: The phylogenetic tree of the hospital sample from P1, P2 and P3 patients after MSA using clustal omega showing their close relation with the respective bacterial strains. P1A1, P1B1, P1B2, – *Staphylococcus aureus*; P2A1, P3A1 – *Staphylococcus epidermidis*; P2B1, P2C1, P2C2 – *Klebsiella pneumoniae*; P3B1 and P3C1 – *Enterobacter cloacae*.

#### 4. Bright feild micropsopic analysis of bacterial cells treated with PBDM peptides

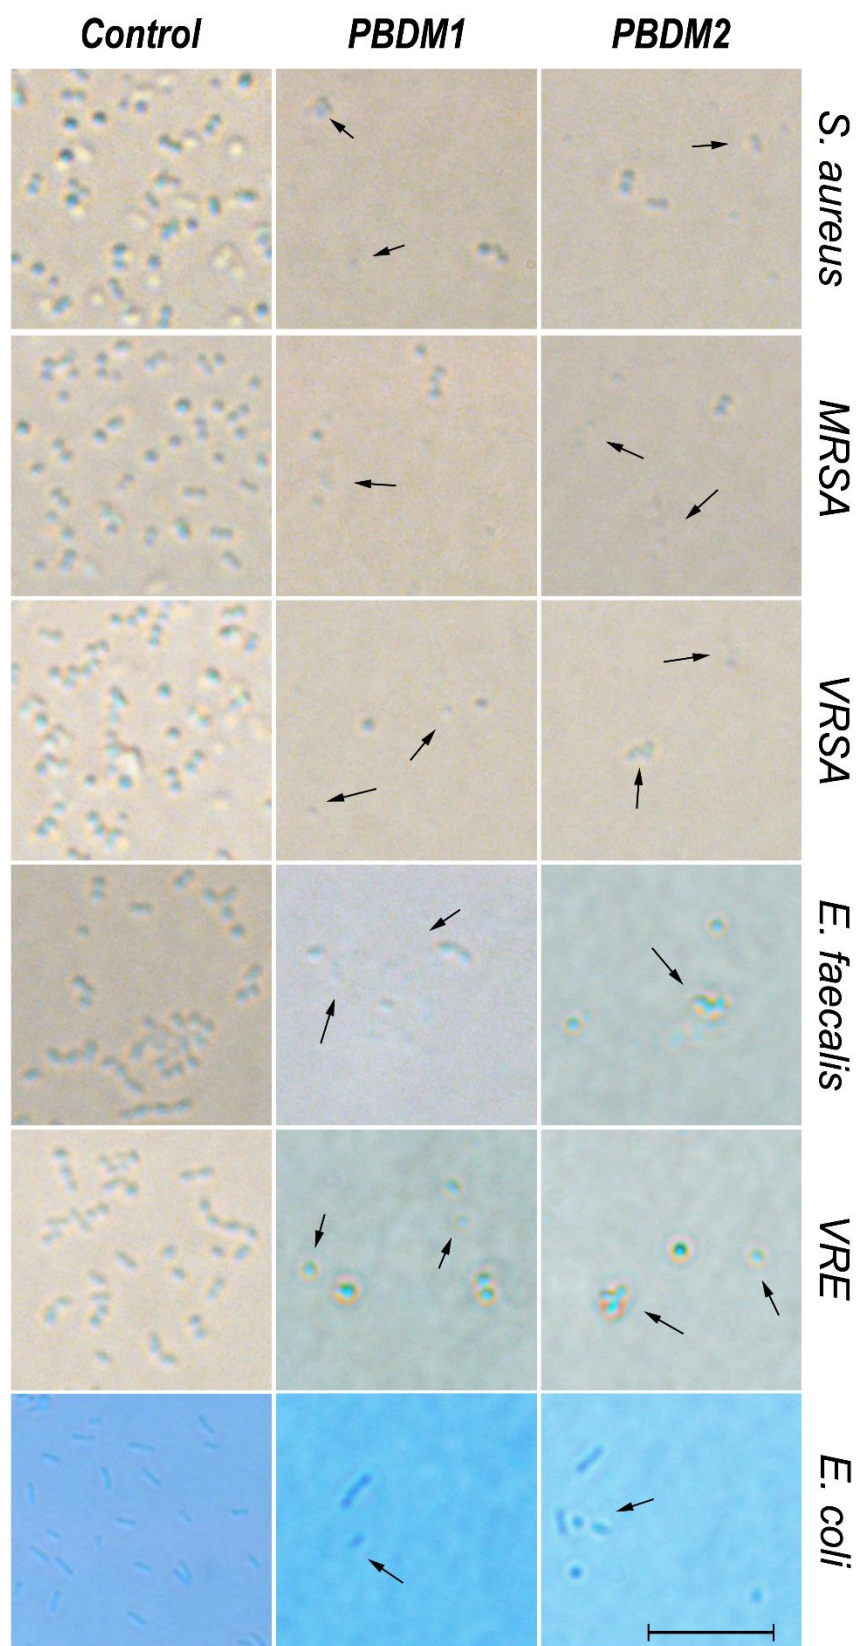

Figure S6: The bright feild micropsopic images of *S. aureus*, MRSA,VRSA, *E. faecalis*, VRE and *E. coli* after treatment with PBDM peptides, black arrows showing cell rupture, change in cellular morphology and cell debris but cells in the control were in healthy condition. Scale is 10  $\mu$ m.



### 5. Calculation of the hemolysis

The percentage of hemolysis was calculated according to the following equation:

$$h = \frac{A_t - A_c}{A_{100\%} - A_c} \times 100 ,$$

Where, h is the percentage of hemolysis;  $A_c$  is the absorbance of the supernatant from negative control (PBS, pH 7.4);  $A_t$  is the absorbance of the supernatant from the samples incubated with the AL3; and  $A_{100\%}$  is the absorbance of the supernatant of positive control (0.1% Triton X-100), which causes complete lysis of RBCs

### 6. Detection of VRSA using PBDM-5(6)-Carboxyfluorescein

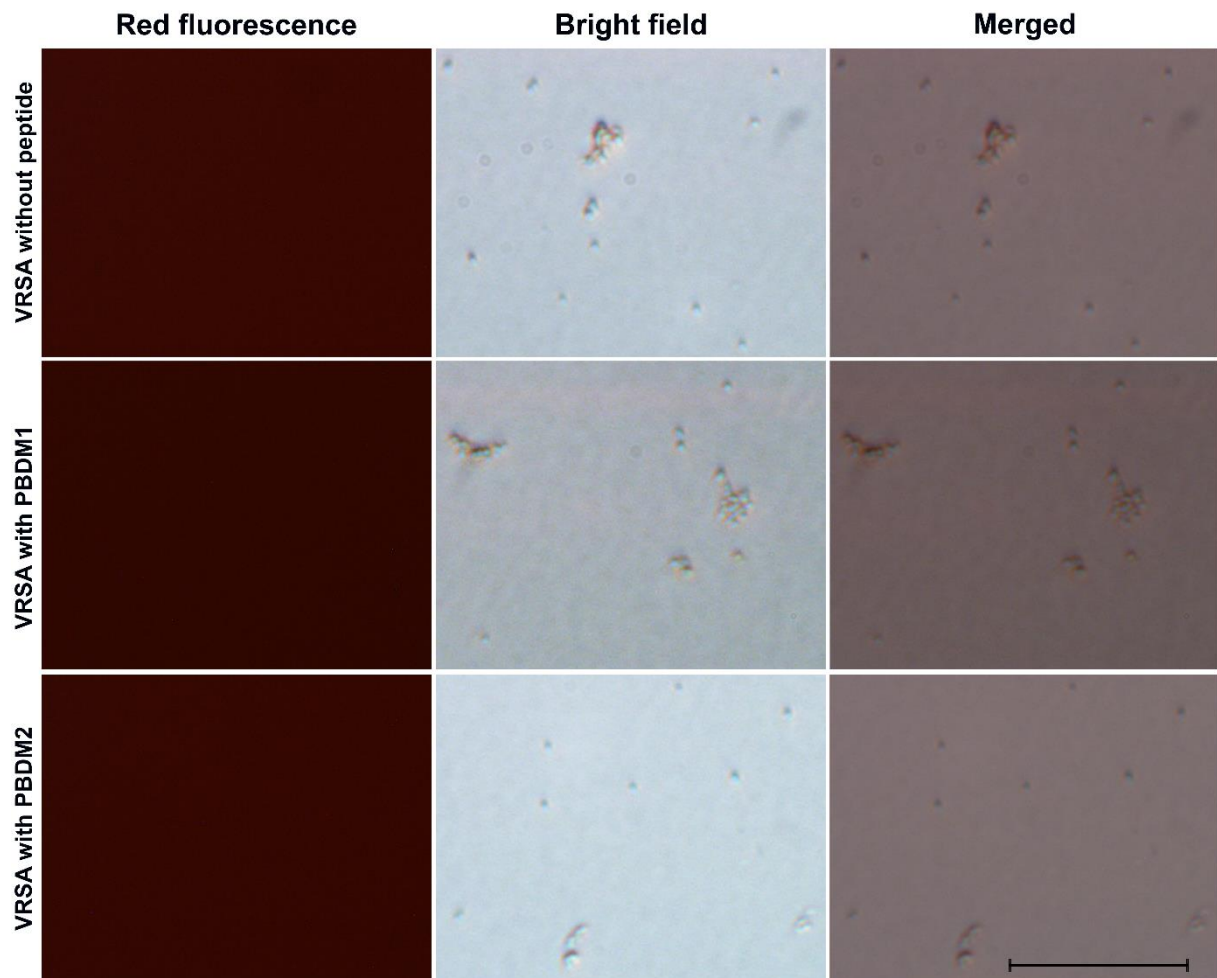

Figure S7: The bright feild and fluorescence microscopic image of control VRSA cells with and without peptide and no presence of dye. Scale is 20  $\mu$ m.

## 7. *In vivo* of PBDM peptide

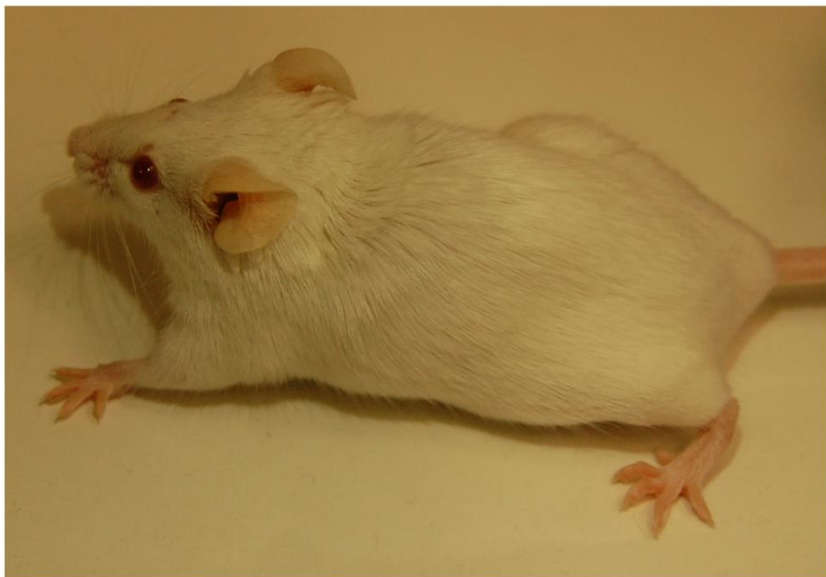

Figure S8: The uninfected control balb/c without treatment and infection.

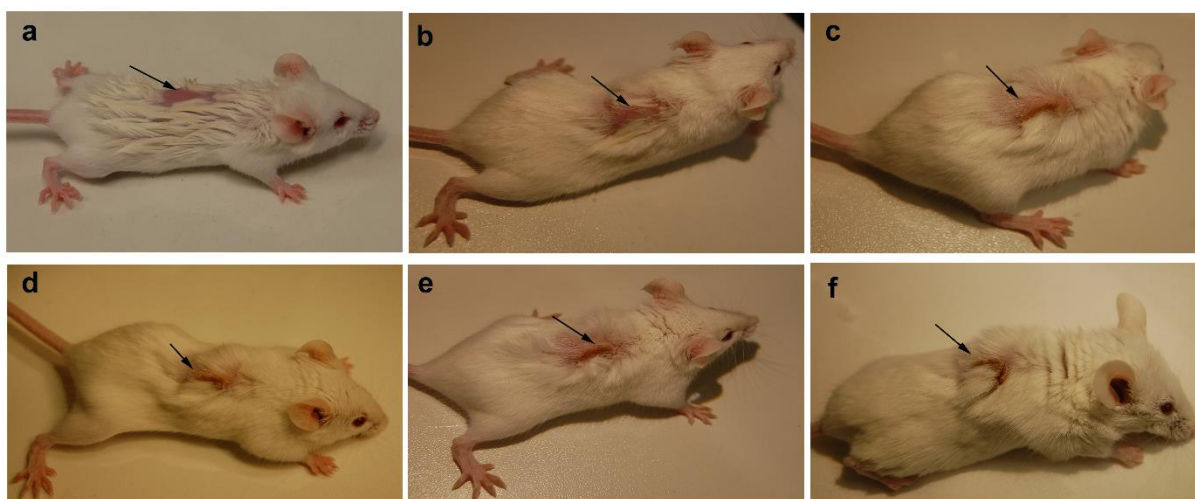

Figure S9: The Infected untreated control with infection by VRSA and no treatment. a is Day 1, b is Day 3, c is Day 6, d is Day 7, e is Day 8, and f is Day 14.

## 8. *Purification of peptides by HPLC-UV*

In HPLC-UV, the column was used Kinetex EVO C18 (150 x 4.6 mm, 5  $\mu$ m). Wavelength was set to 214 nm. Mobile phase A consisted of water + 0.1% formic acid. Mobile phase B consisted of methanol + 0.1% formic acid. Gradient mode: 0 min 3% B  $\rightarrow$  30 min 50% B  $\rightarrow$  50 min 3% B  $\rightarrow$  50.1 min 85% B  $\rightarrow$  55 min 85% B  $\rightarrow$  55.1 min 3% B  $\rightarrow$  60 min 3% B  $\rightarrow$  STOP. Flow rate was 0.5 mL/min. Injected sample volume was 20  $\mu$ L. Prior analyses the samples were diluted 100x with water + 0.1% formic acid.

## 9. Colony Forming Unit (CFU) assay

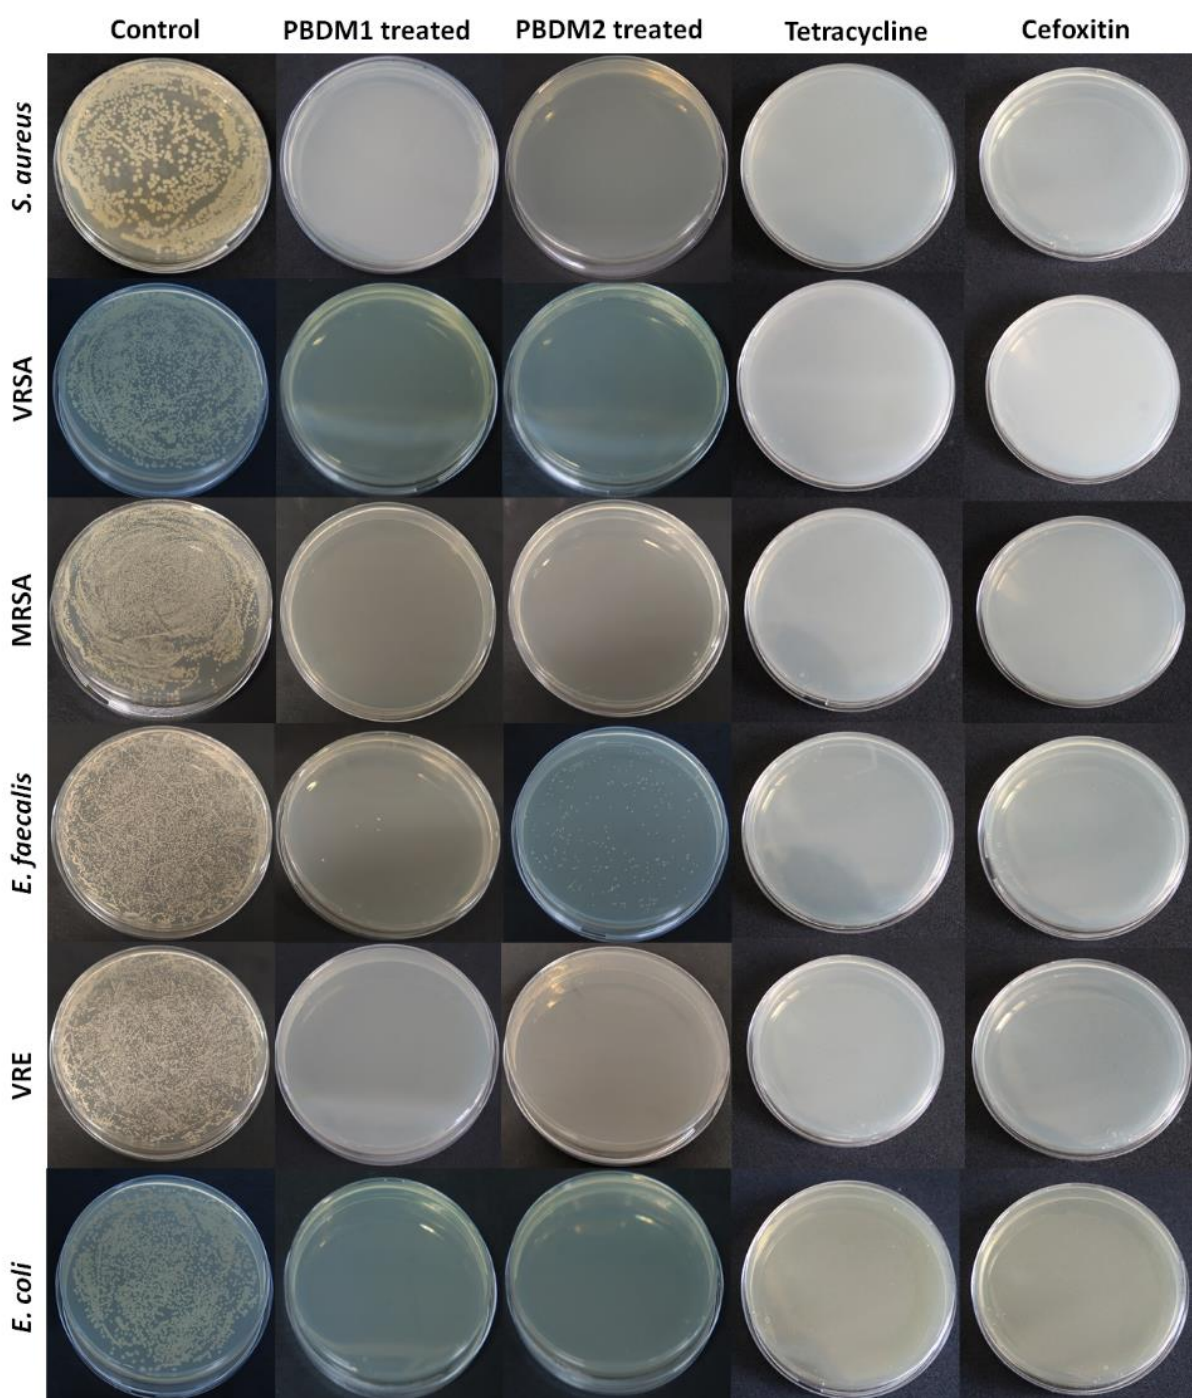

Figure S10: The Colony Forming Unit assay of *S. aureus*, MRSA, VRSA, *E. faecalis*, VRE and *E. Coli*, when treated with PBDM peptides. The positive control plates contain tetracycline and cefoxitin.

## 10. Cytotoxicity of the PBDM peptides defined as IC<sub>50</sub>



The IC<sub>50</sub> was the concentration of the peptides required for 50% inhibition of the growth of the HBL 100 and MDA MB 468 cells. The formula used was:

$$y = ax + b;$$

Where y is the percentage of the inhibition, a is the slope of the graph, x is the concentration of peptides and b is the y intercept.

Table S2: IC<sub>50</sub> values of PBDM peptides.

| Name of the cell lines | IC <sub>50</sub> of PBDM1 (μg/mL) | IC <sub>50</sub> of PBDM2 (μg/mL) |
|------------------------|-----------------------------------|-----------------------------------|
| HBL 100                | 115.02                            | 103.8                             |
| MDA MB 468             | 67.55                             | 61.52                             |

## 11. Characterization of PBDM

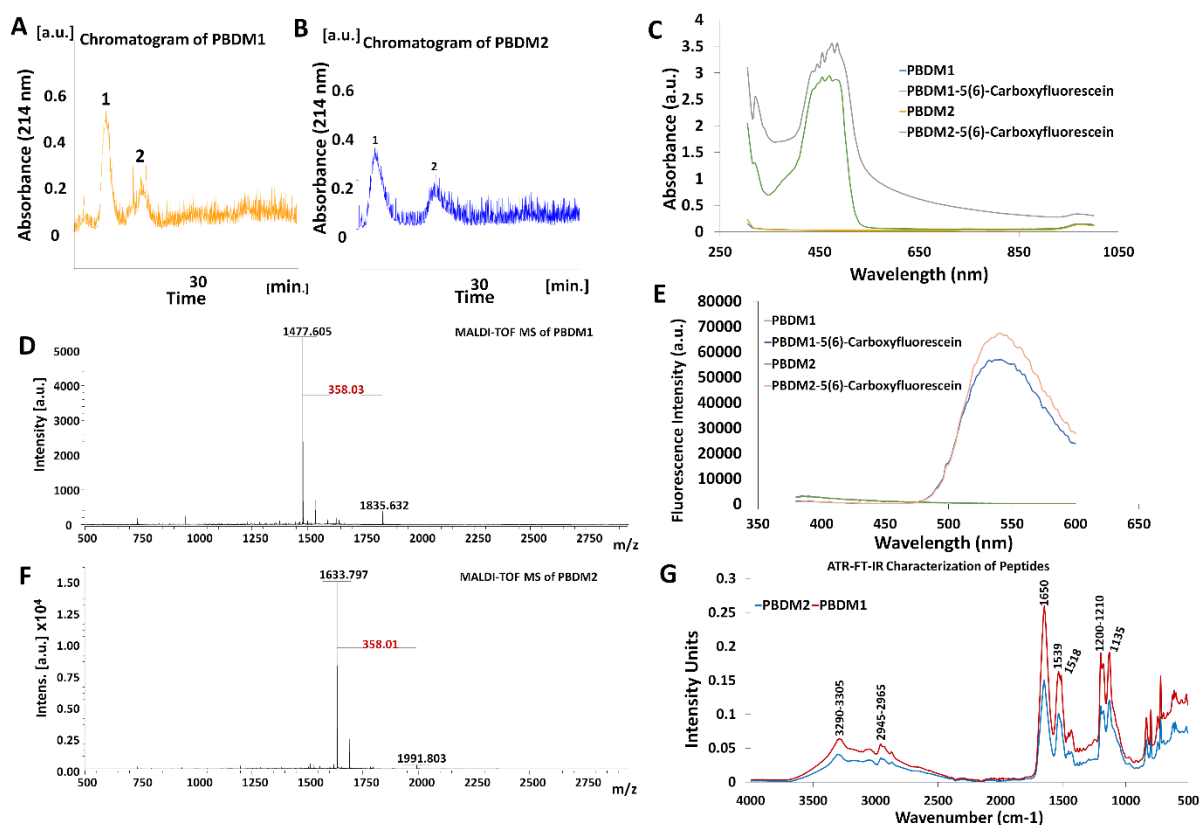

Figure S11: Characterization of peptides A) HPLC-UV chromatogram of PBDM1 peptide (Peak1) and its conjugate (Peak2), B) HPLC-UV chromatogram of PBDM2 peptide (Peak1) and its conjugate (Peak2); HPLC system consisted of two pumps ESA Model 584 and an autosampler ESA Model 542 (ESA Inc., Chelmsford, USA). C) The Absorbance spectra of PBDM and its conjugates. D) MALDI-TOF mass spectrum of peptide

PBDM1 and its conjugate with 5(6)-Carboxyfluorescein N-hydroxysuccinimide ester (473.39 Da). The mass difference of 358.03 belongs to 5(6)-Carboxyfluorescein without molecule of N-hydroxysuccinimide (115.09 Da), as it was detached after conjugation with peptide; E) The fluorescence spectra of PBDM and its conjugates; F) MALDI-TOF mass spectrum of PBDM2 and its conjugate, similar as PBDM1; G) ATR-FT-IR analysis. Characteristic amide I band at  $1650\text{ cm}^{-1}$  is indicative of random coil secondary structure of peptides.
